# Supplementary material for: Multiple amygdaloid divisions of arcopallium send convergent projections to the nucleus accumbens and neighboring subpallial amygdala regions in the domestic chicken: a selective pathway tracing and reconstruction study
Source: PubMed Central journal article supplement (PMC5225175; doi:10.1007/s00429-016-1219-8), 2016-04-06
Supplement: 429_2016_1219_MOESM1_ESM.pdf [file 429_2016_1219_MOESM1_ESM.pdf]

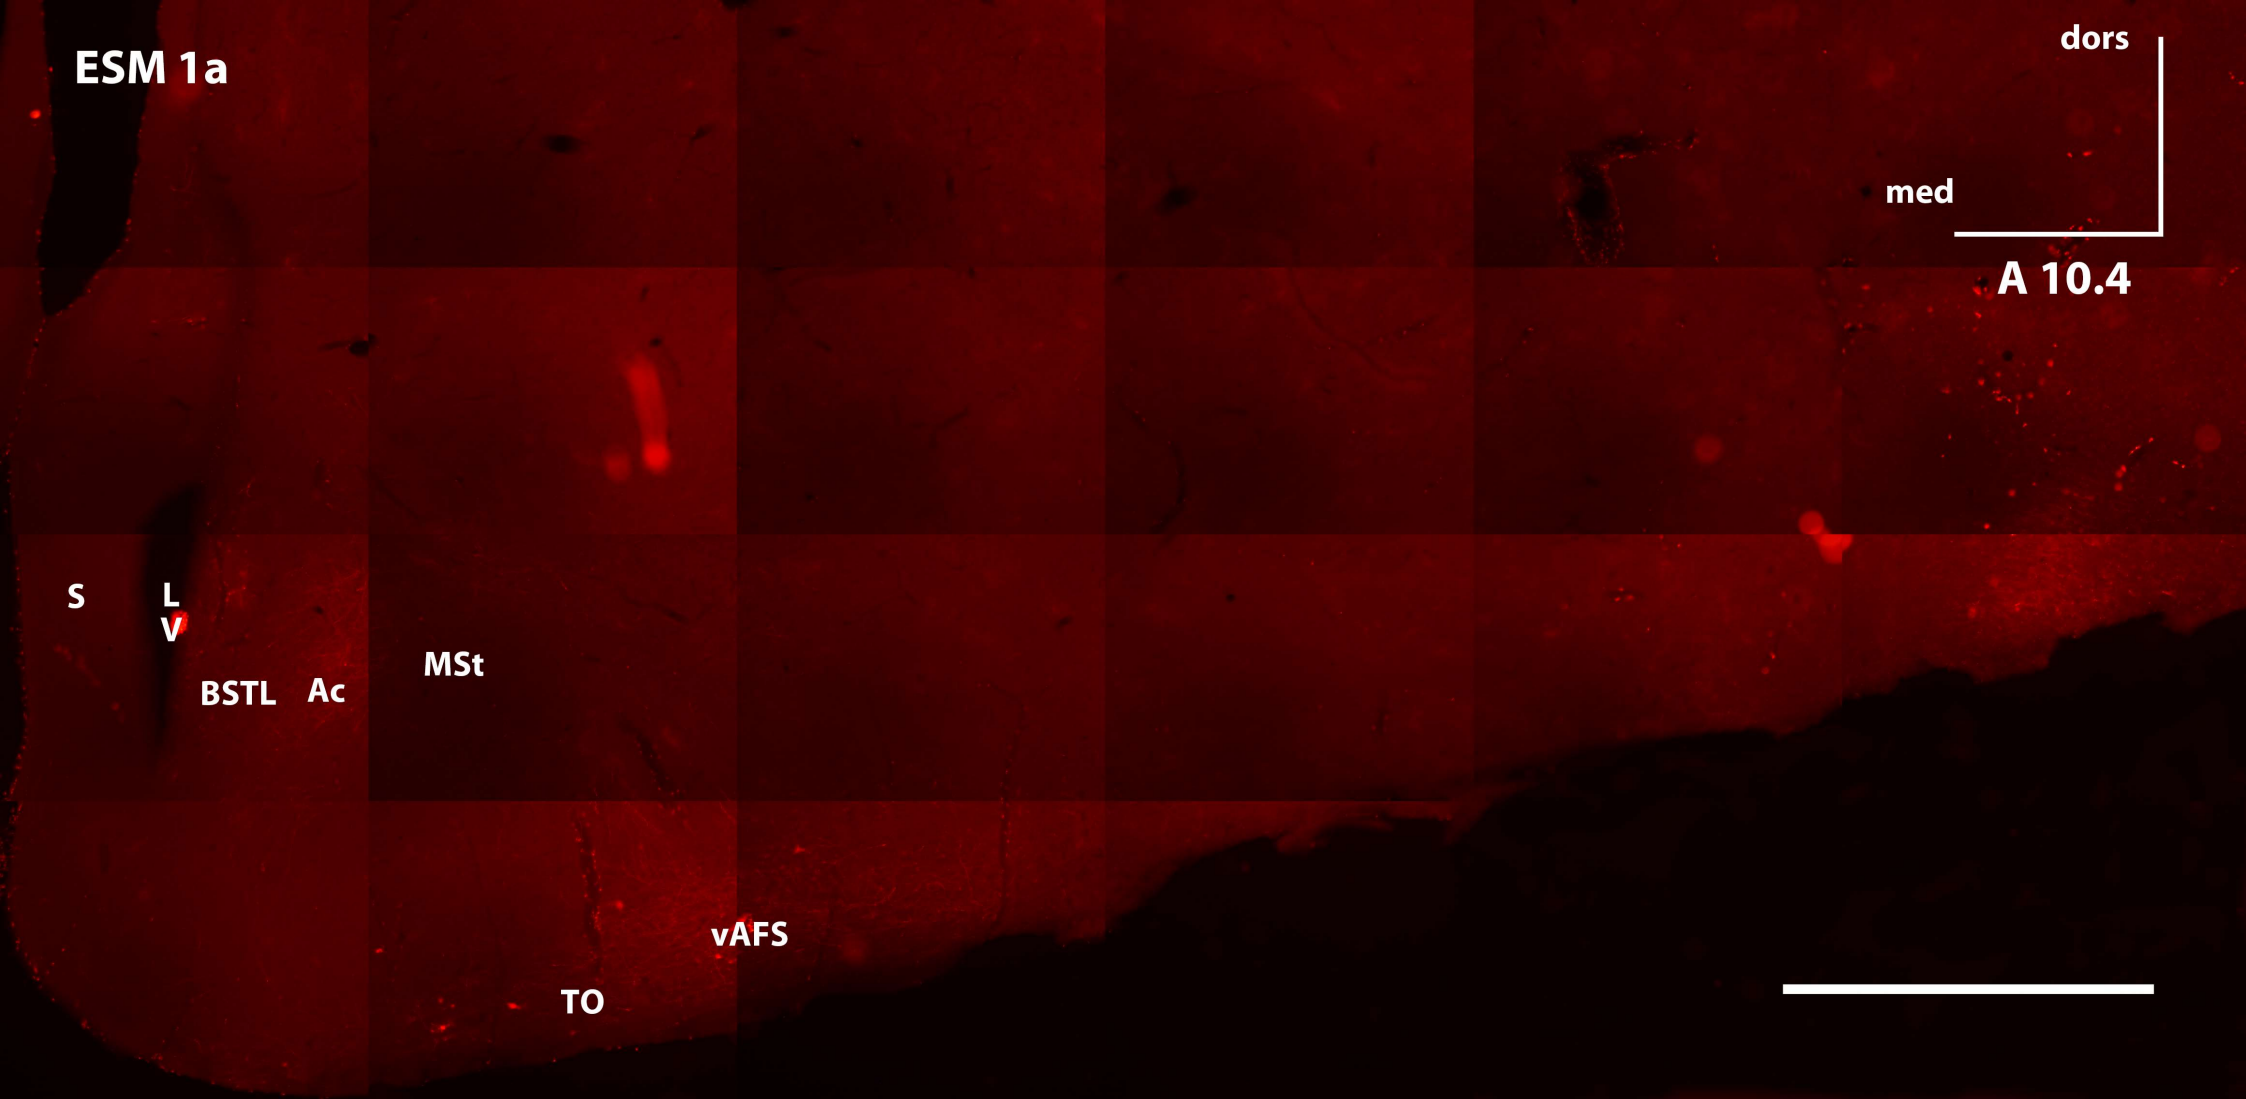

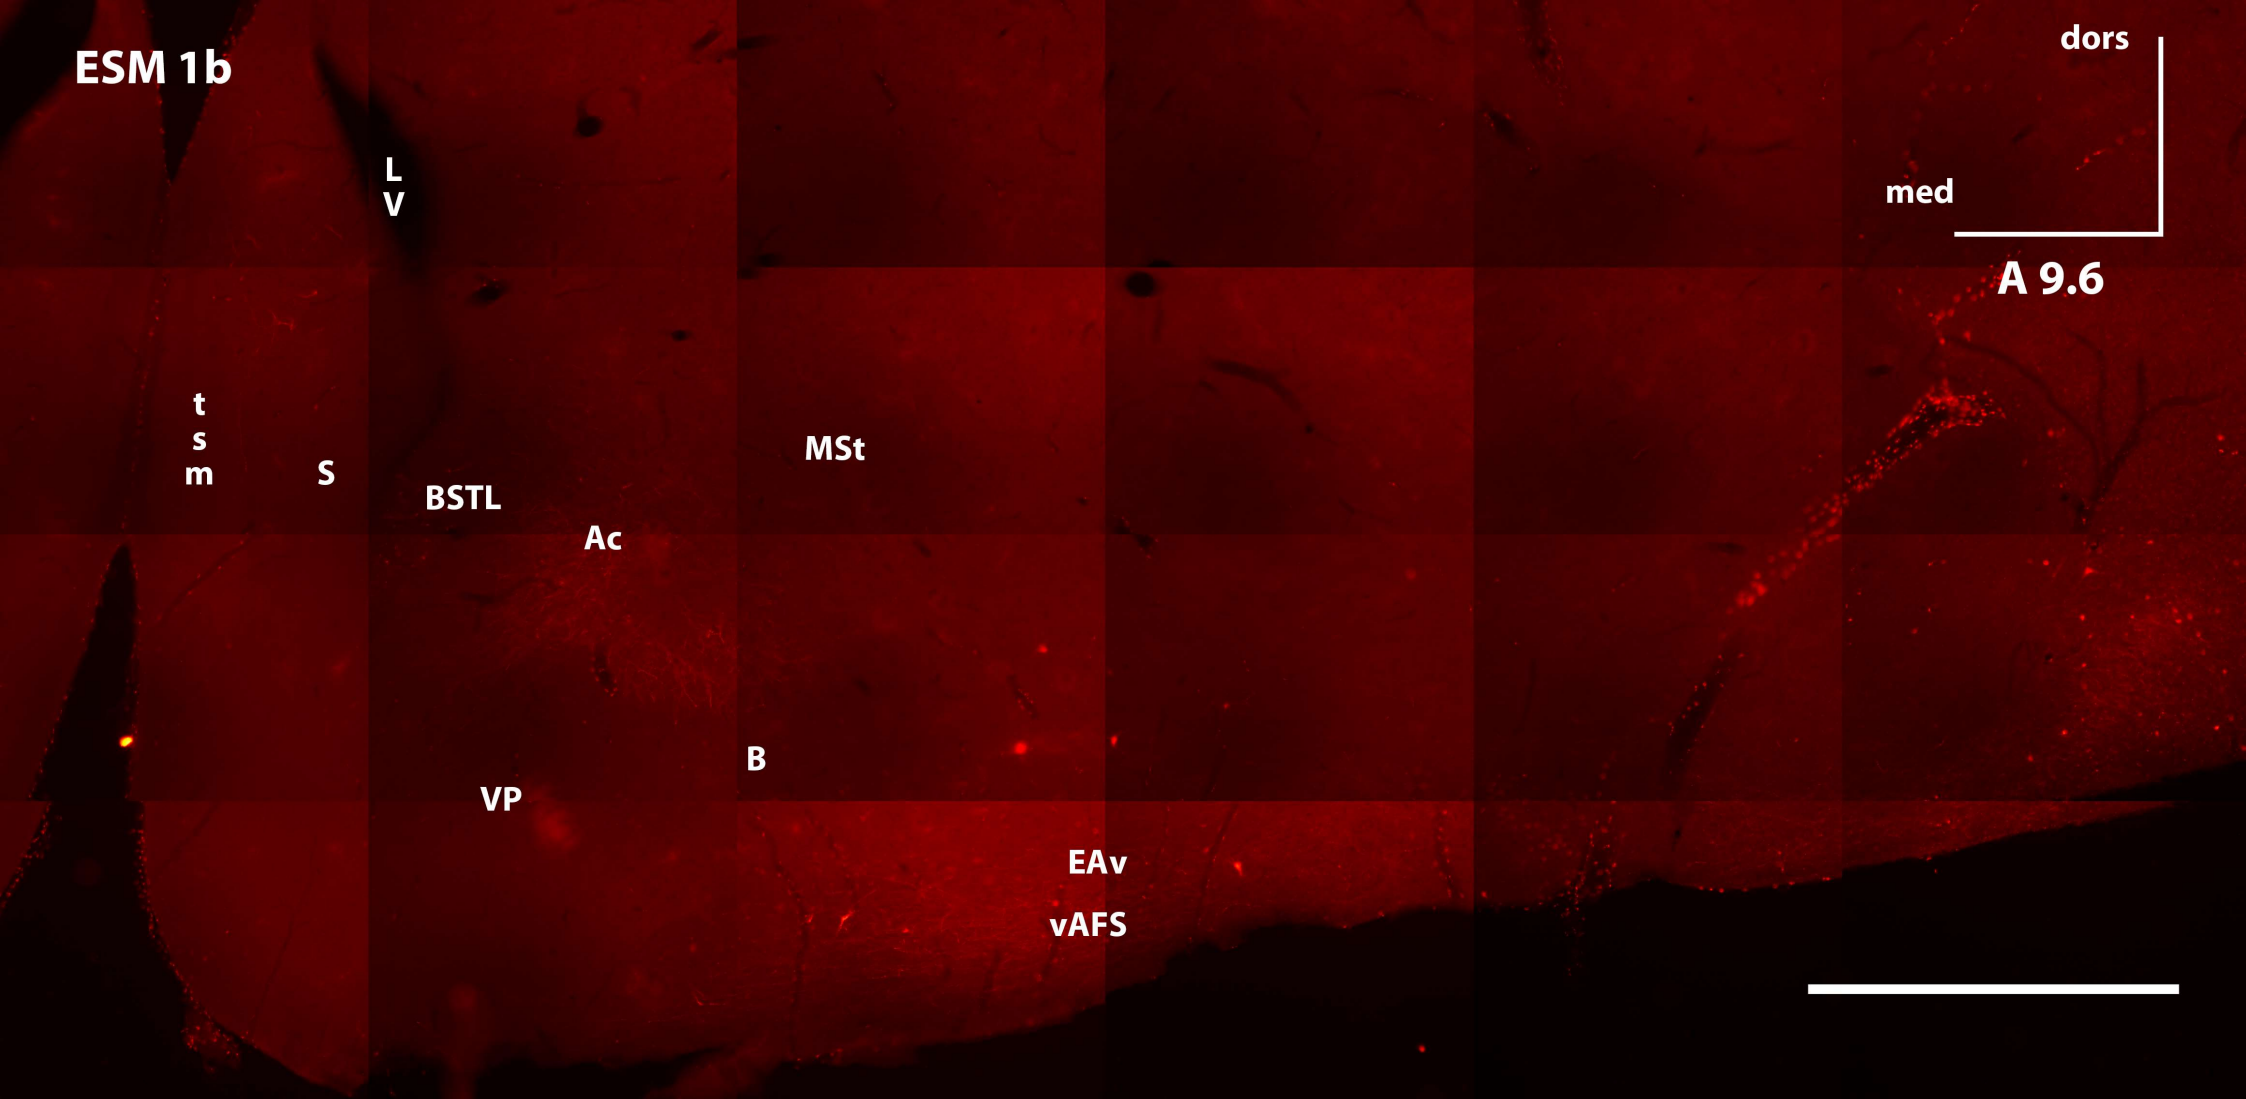

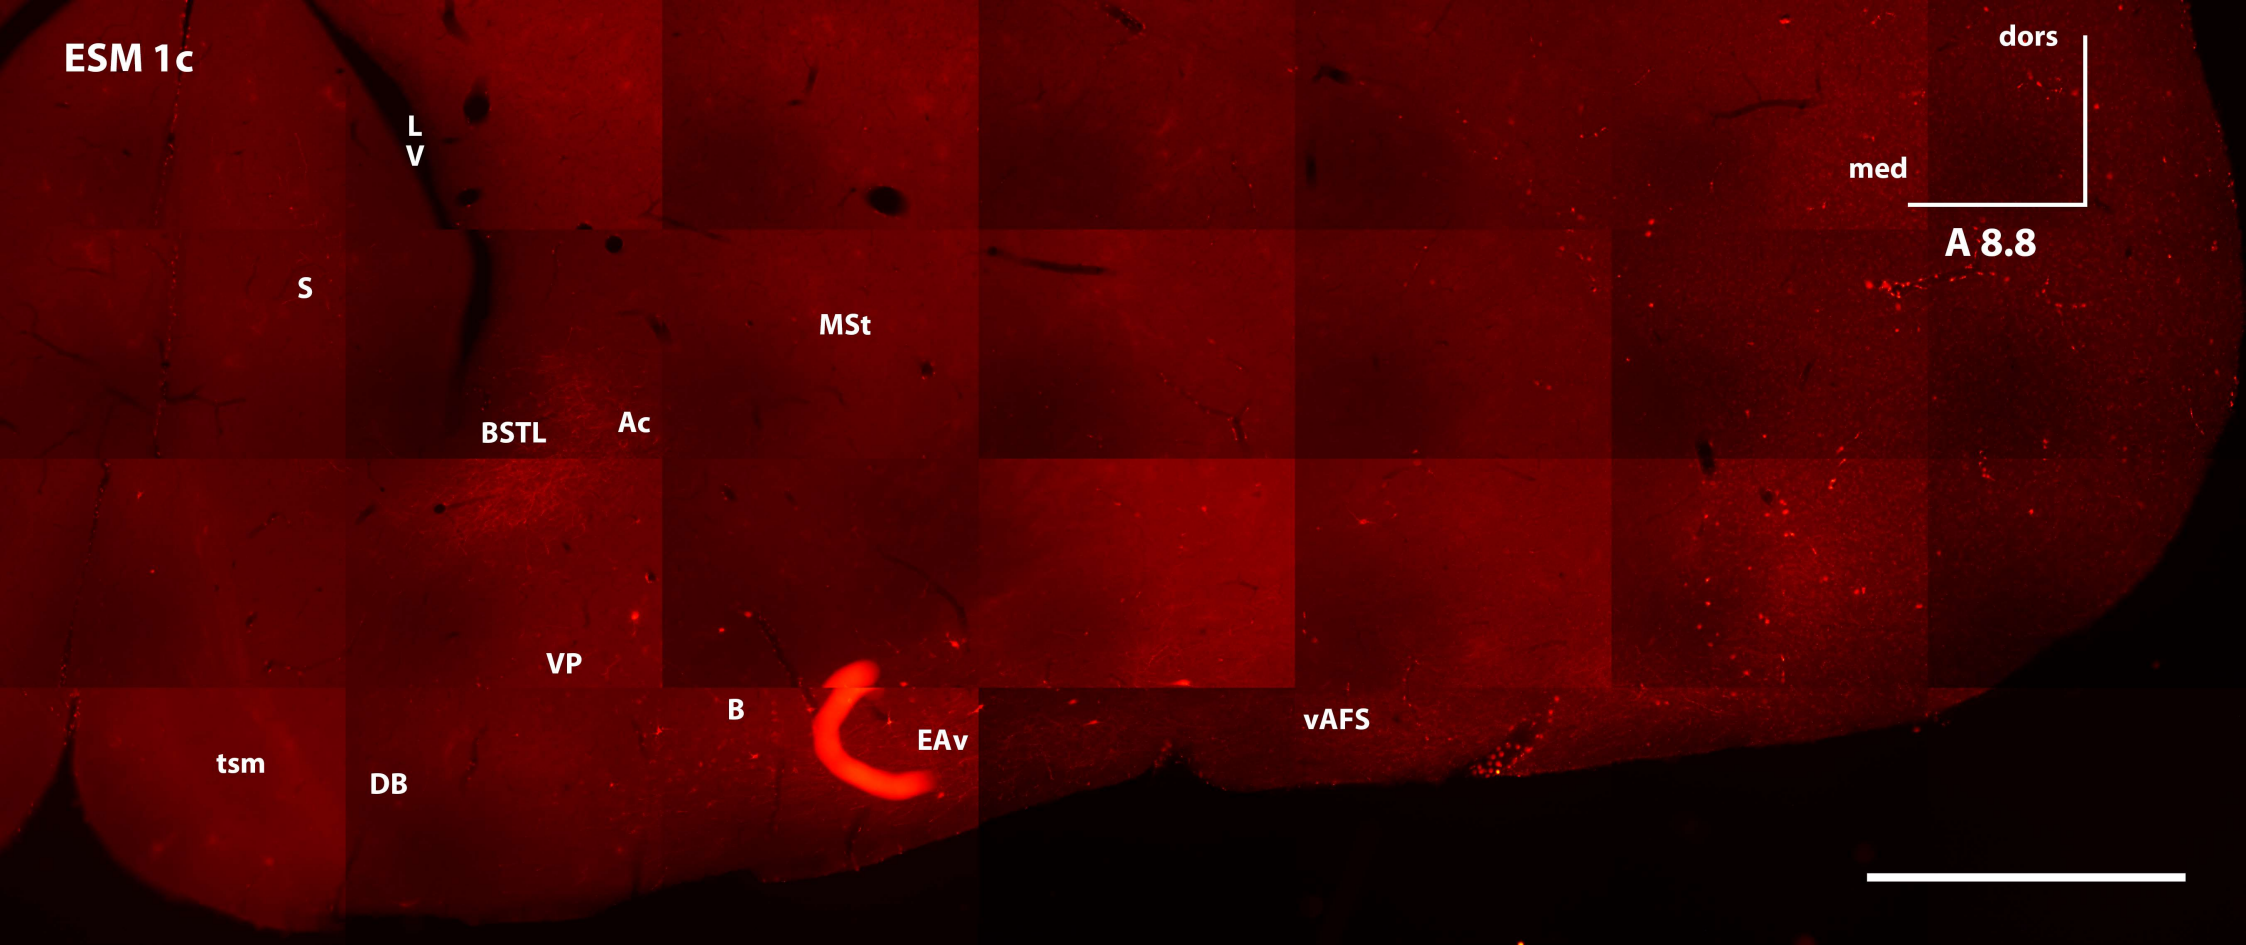

Hanics et al. 2015 Brain Structure and Function

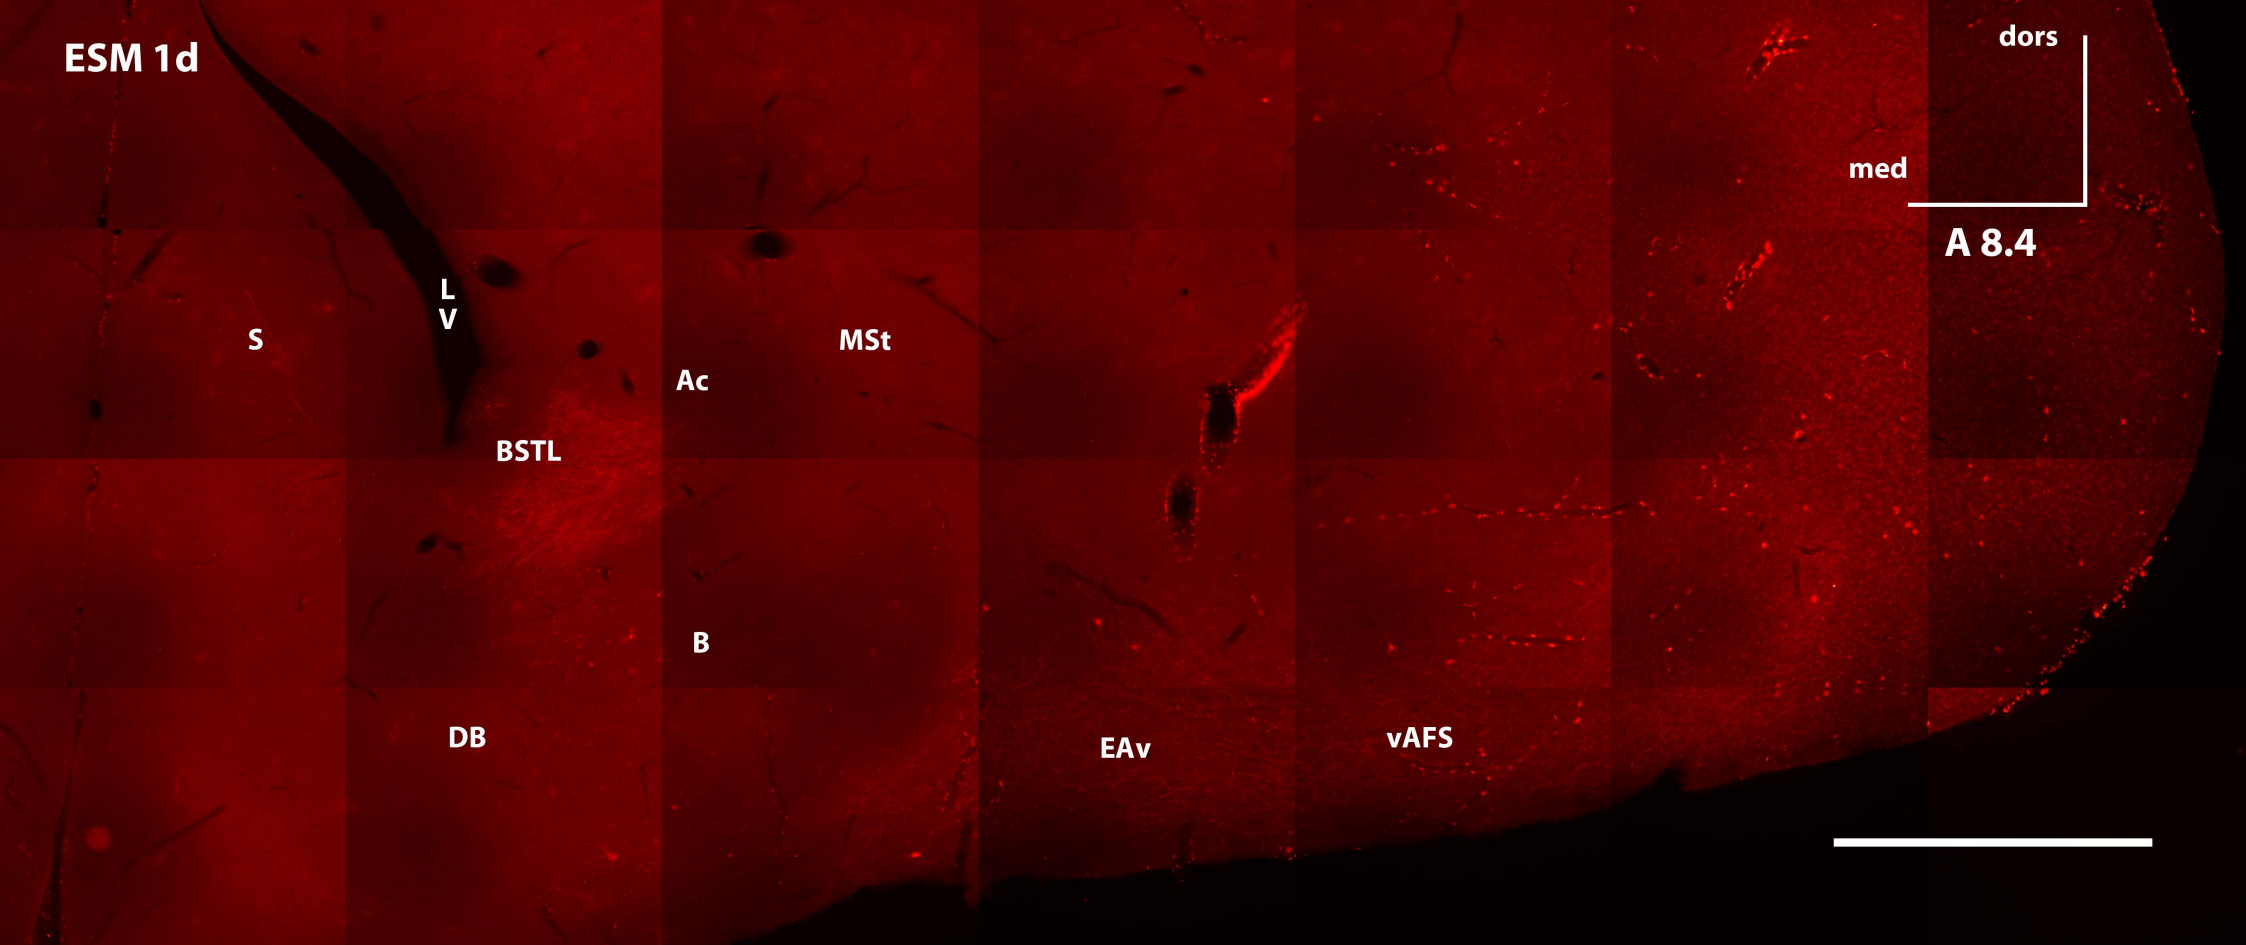

Hanics et al. 2015 Brain Structure and Function

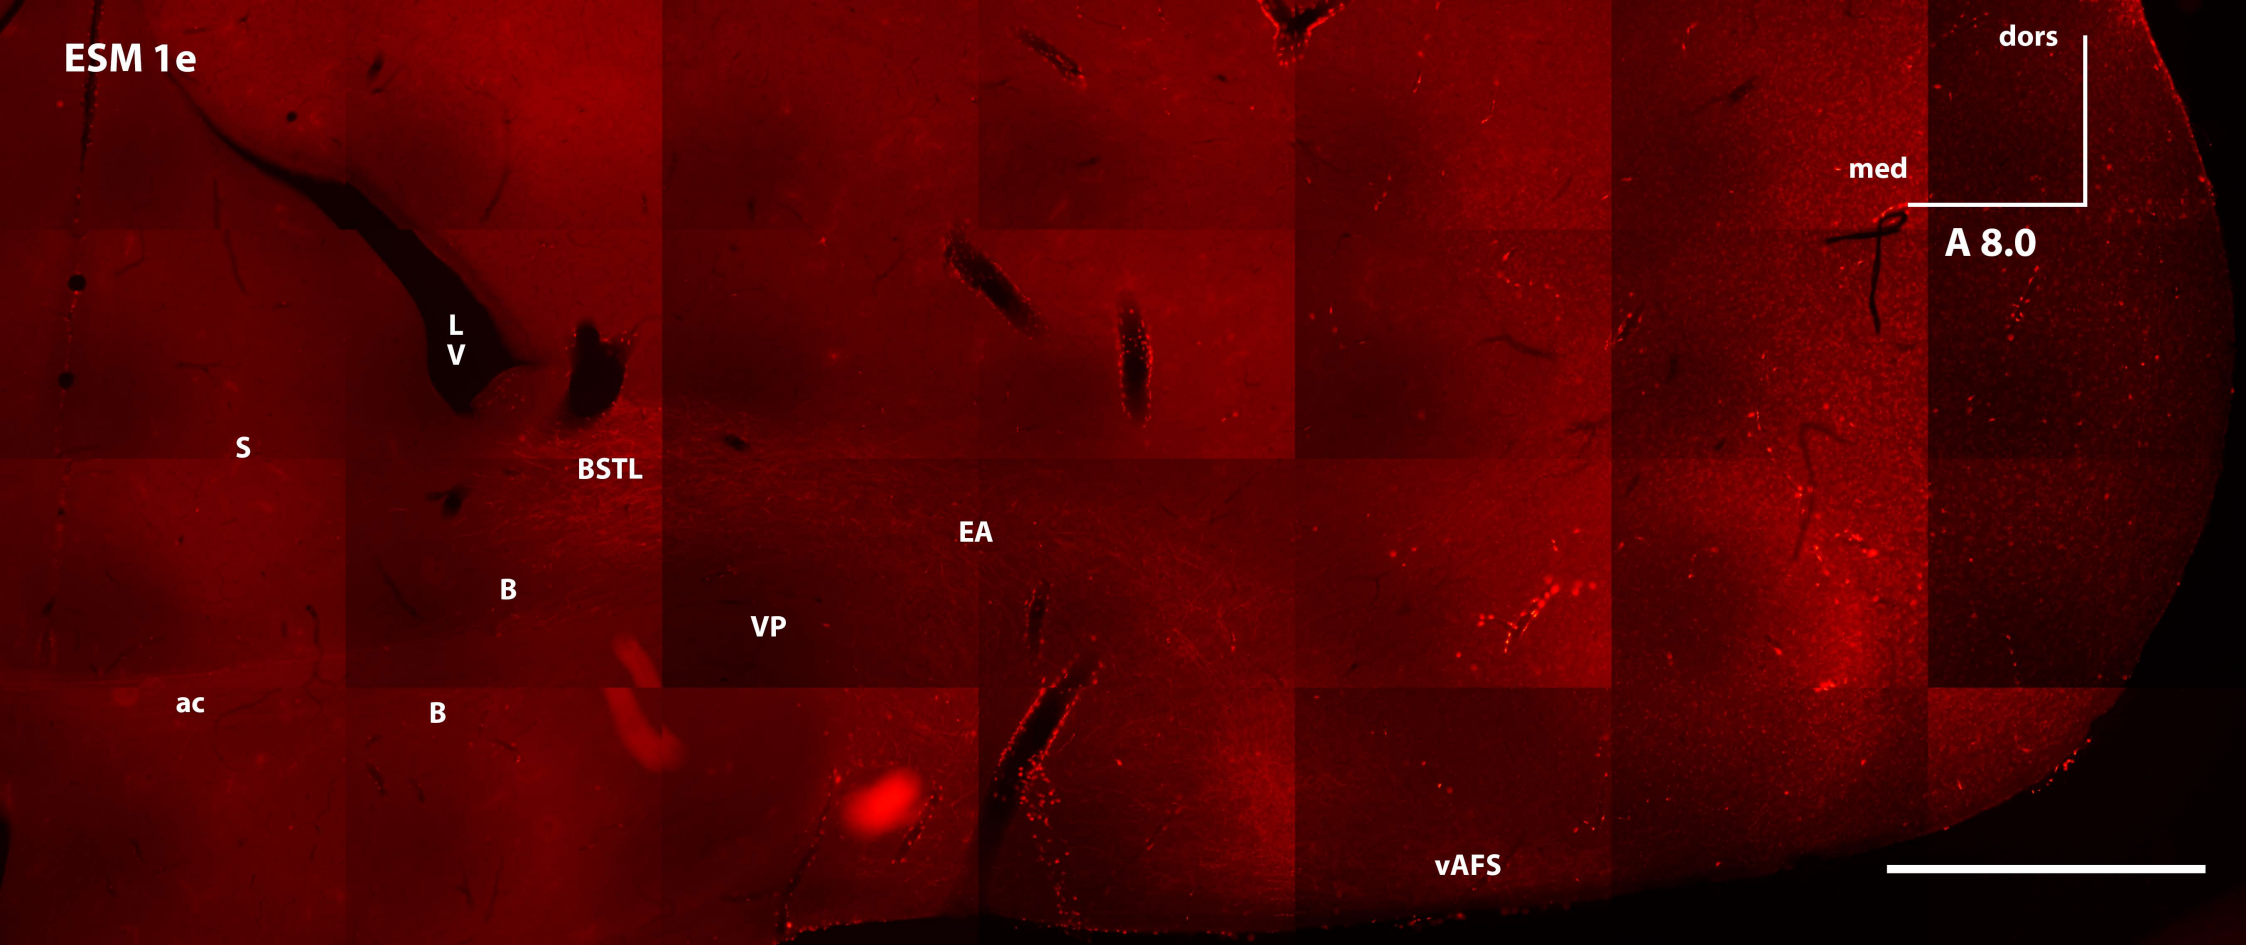

Hanics et al. 2015 Brain Structure and Function

ESM 1f

dors

med

A 7.0

APir

DA594 injection

dAFS

LV

BSTL

DIENCEPHALON

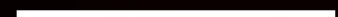

Hanics et al. 2015 Brain Structure and Function

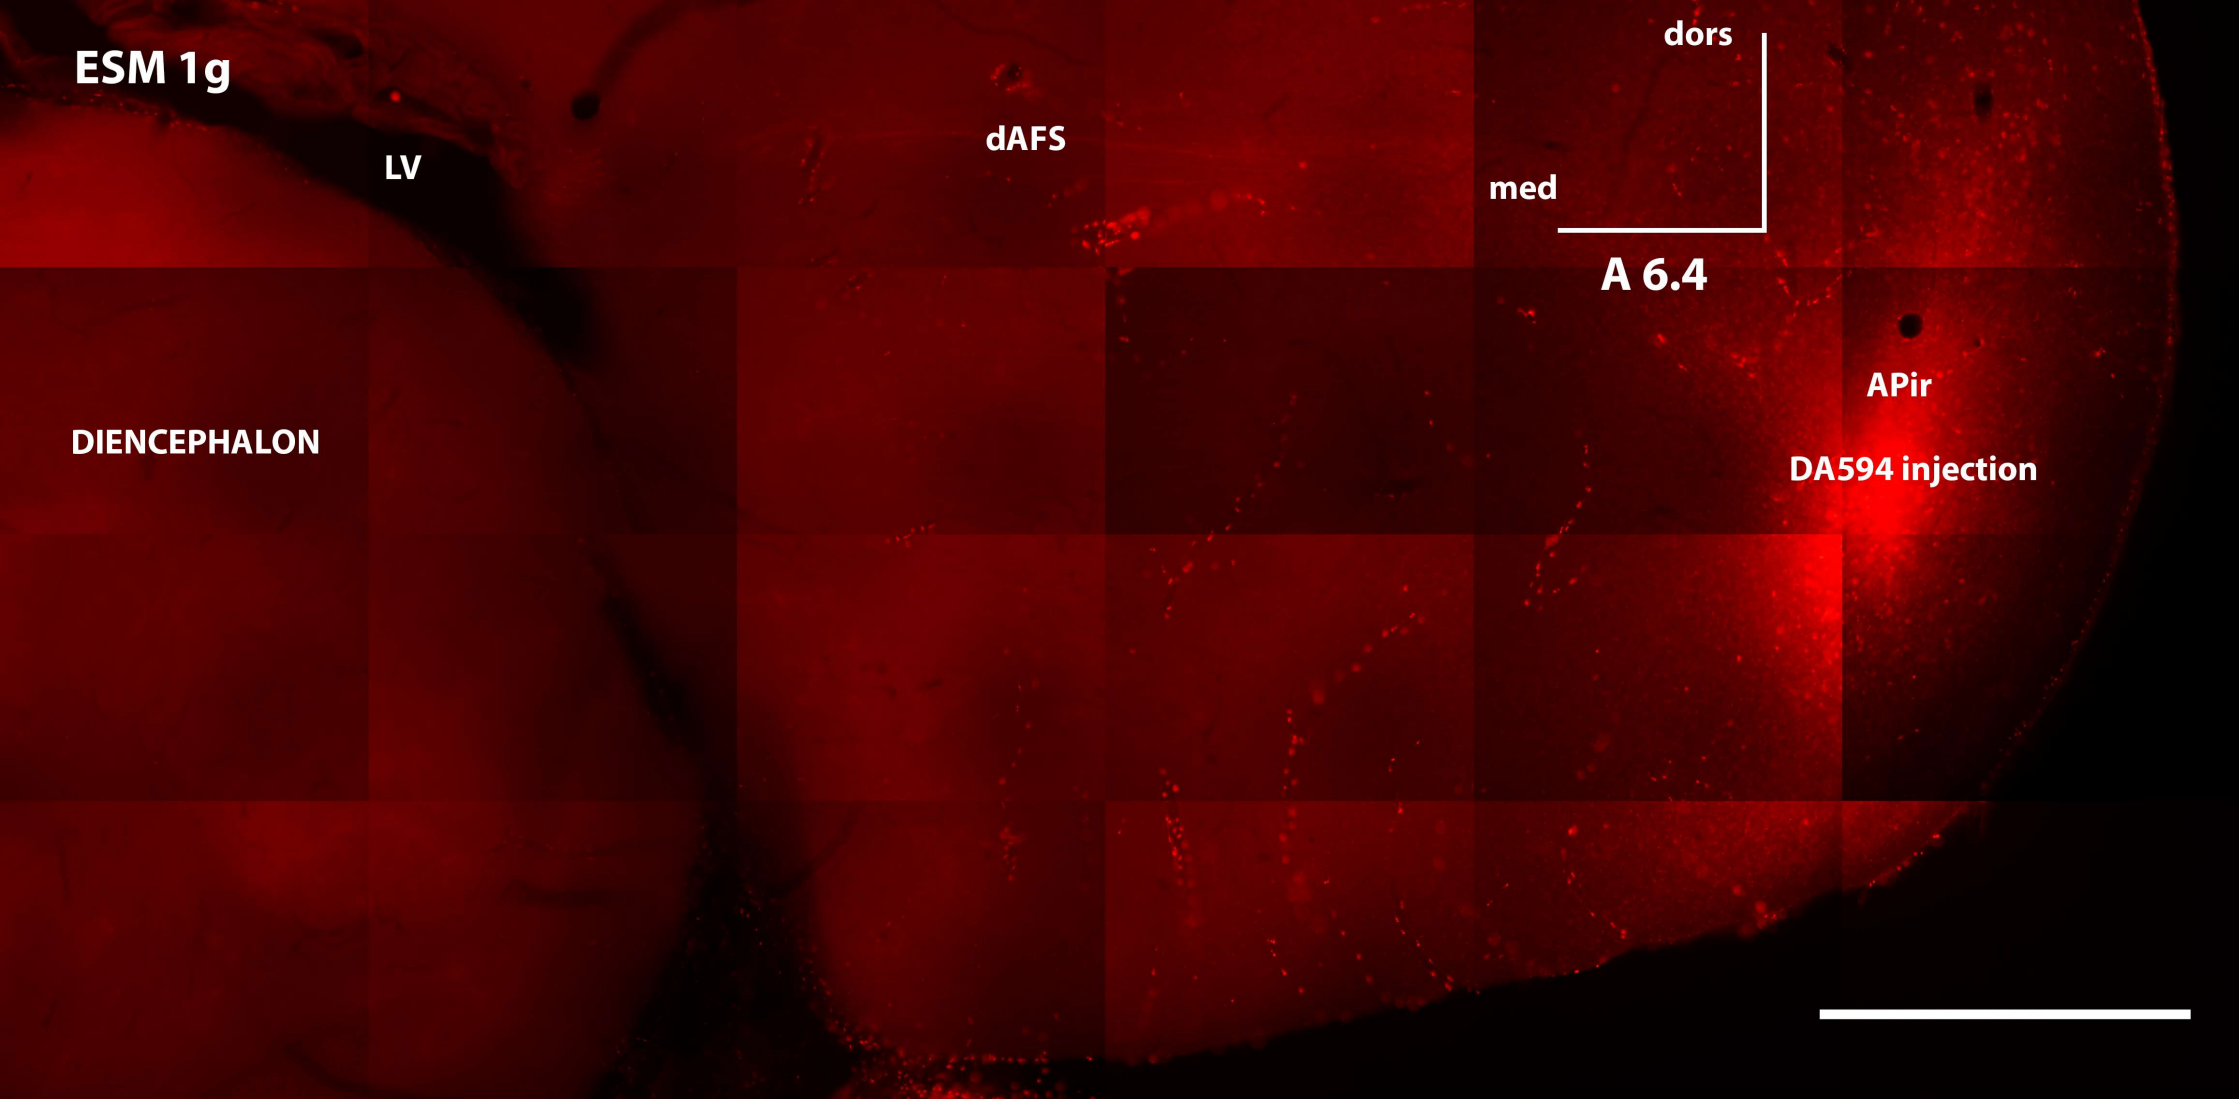

Hanics et al. 2015 Brain Structure and Function
